# Supplementary figures and images for: A Roadmap for Genome-Based Phage Taxonomy
Source: MDPI journal article supplement (doi:10.3390/v13030506), 2021-03-18

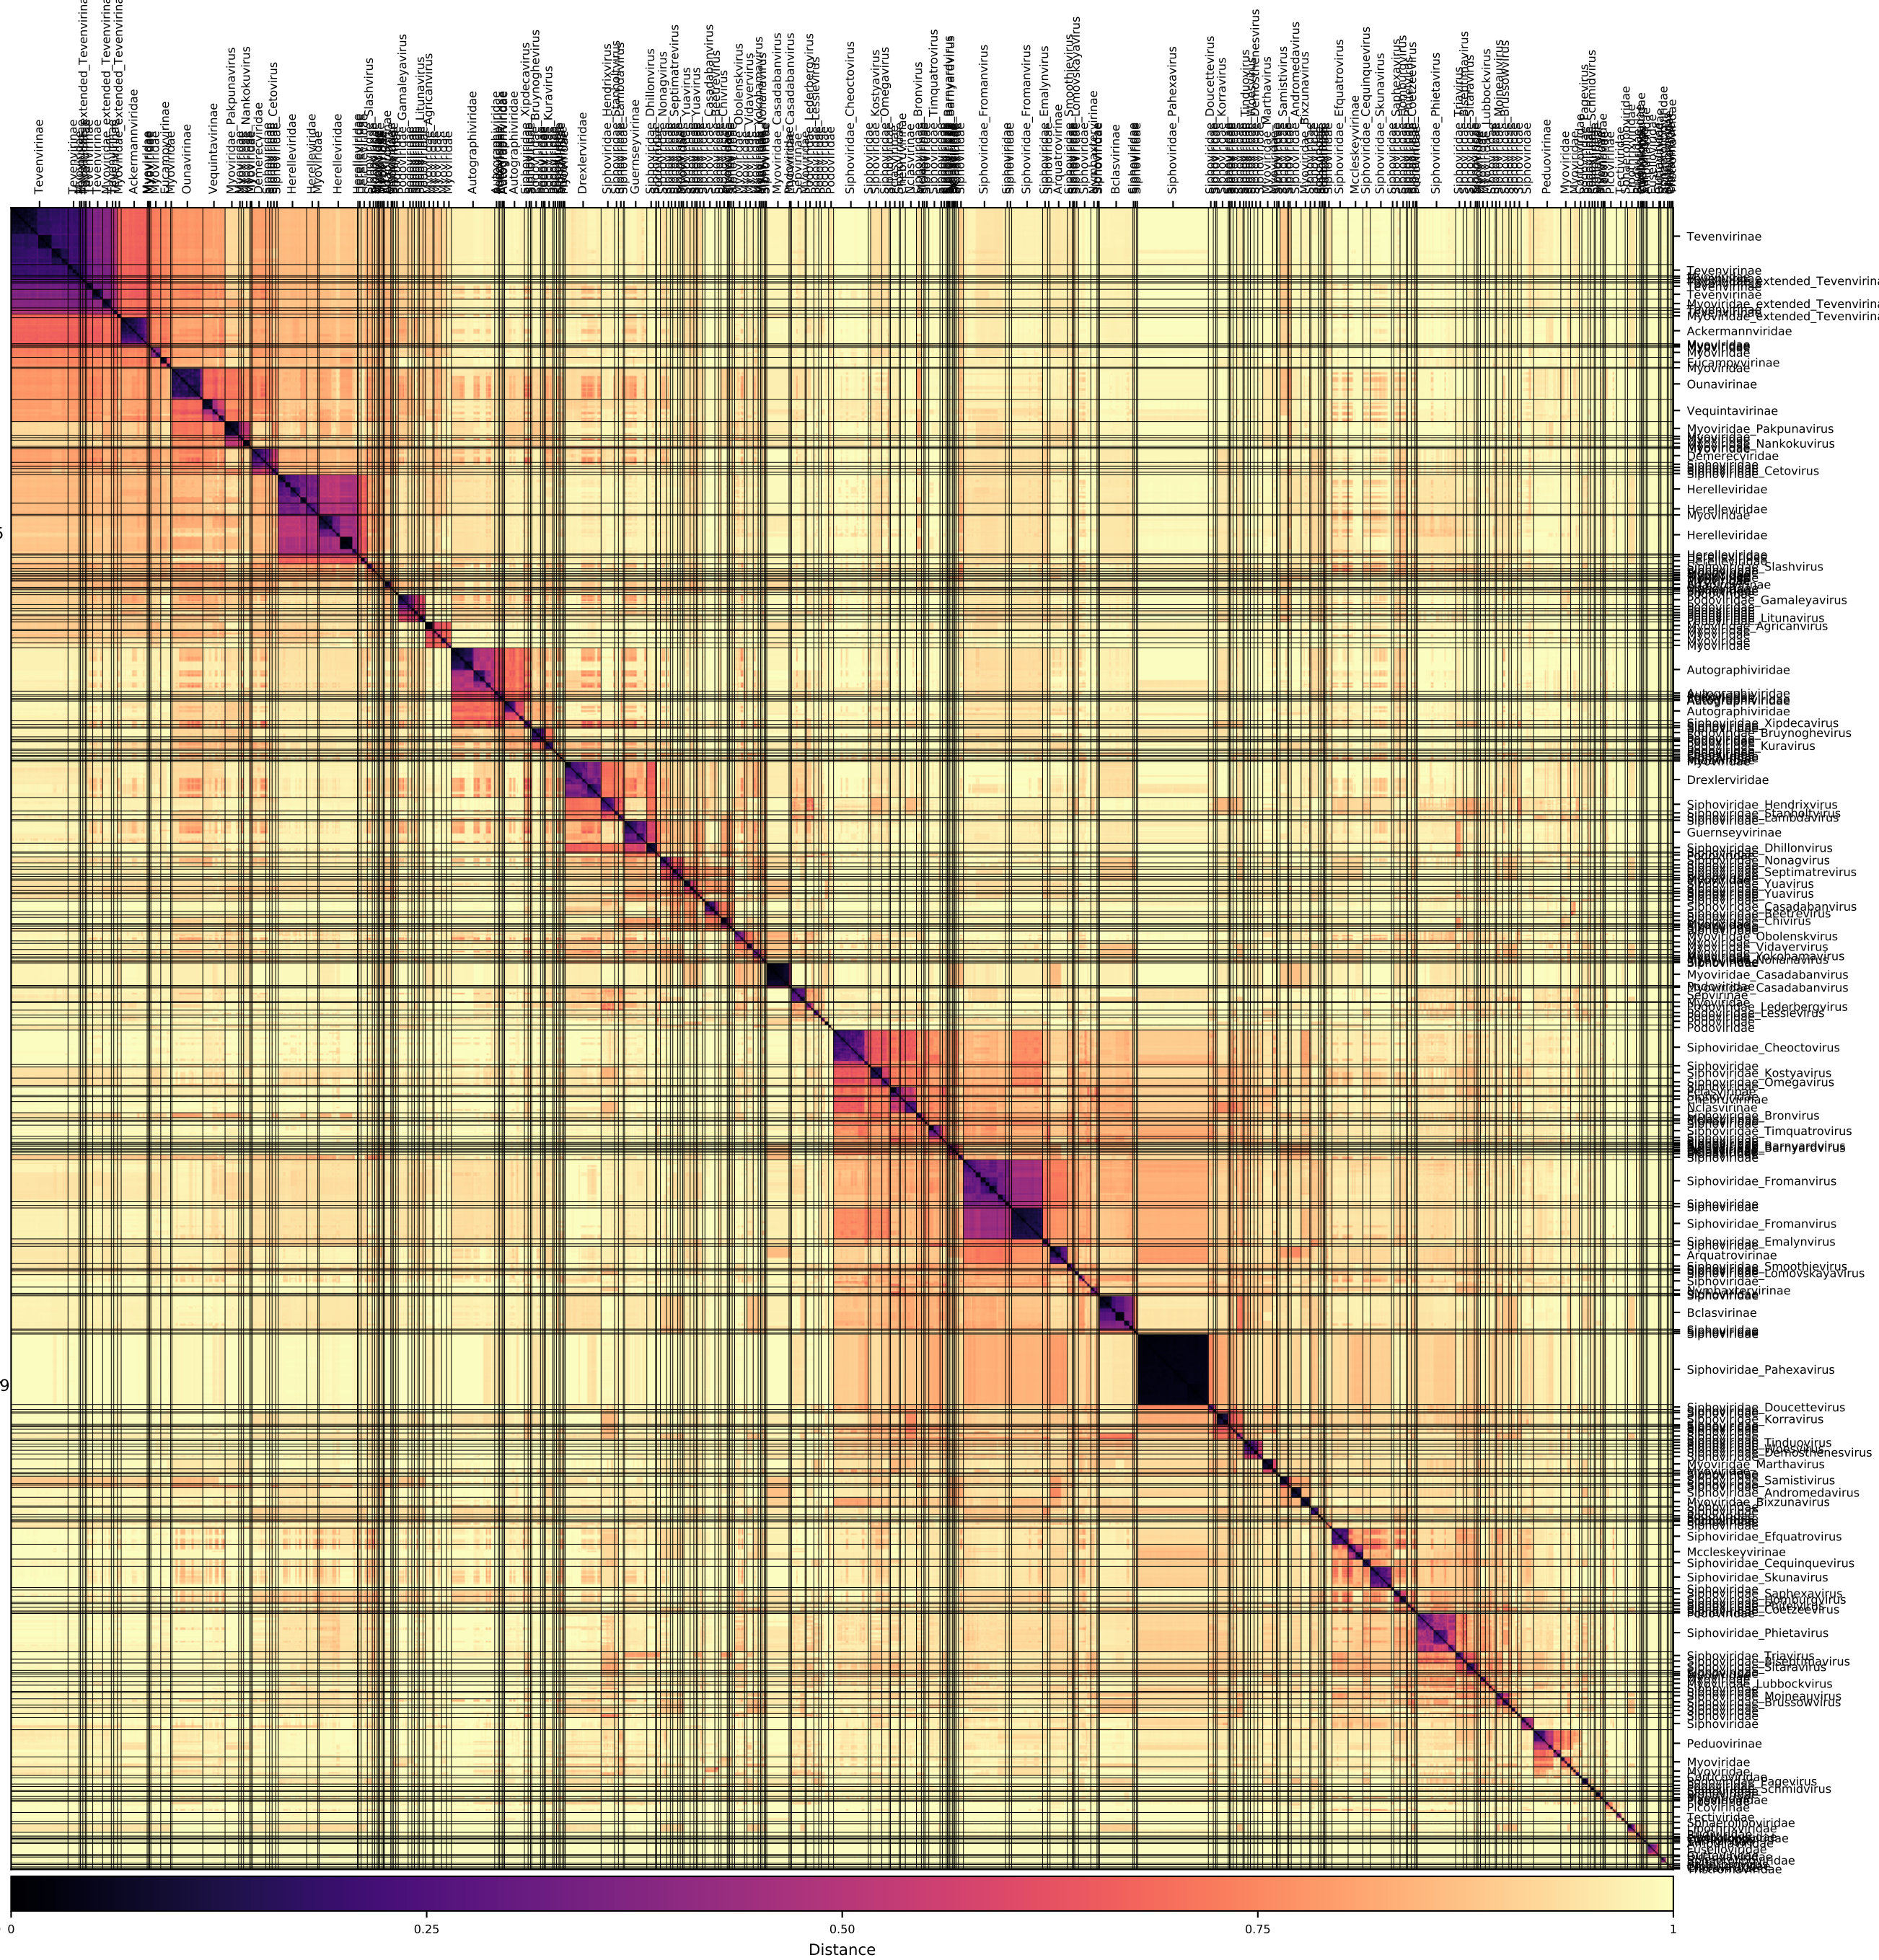

Supplement: s1 [file s1]

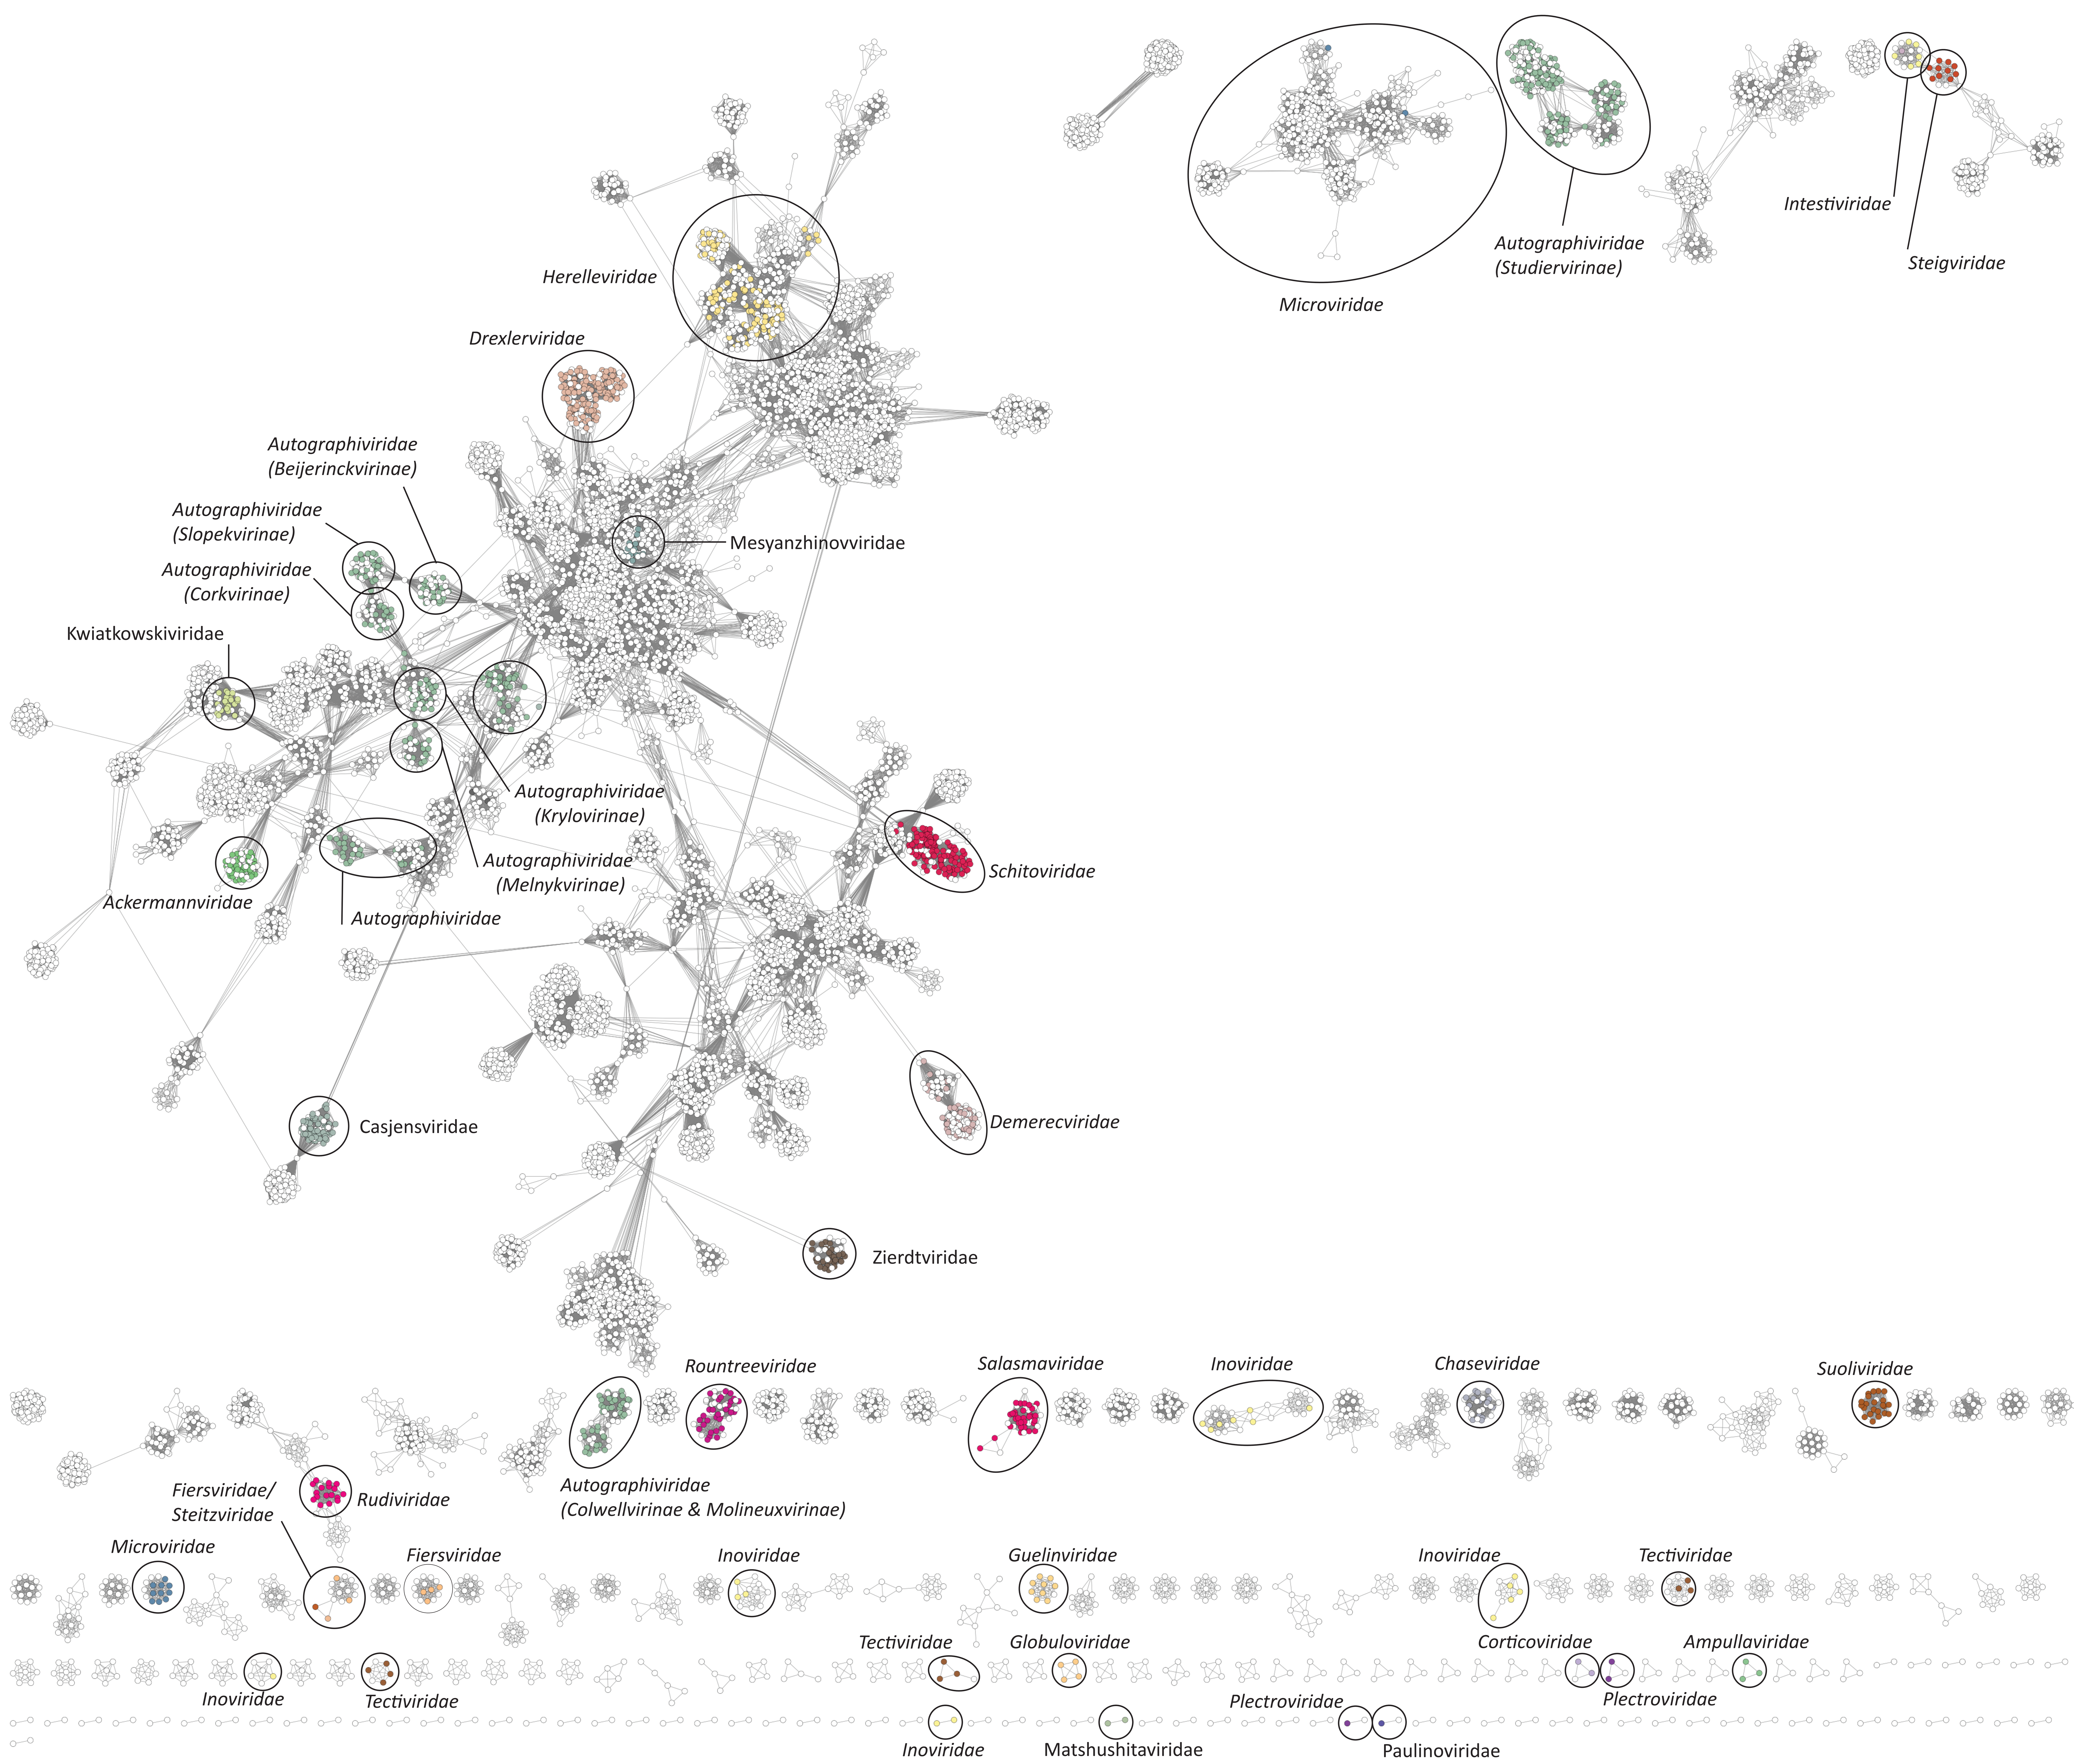

Supplement: s1 [file s1]
